# Supplementary material for: 4-Carboxylphthalhydrazidate-bridged layered Pb(ii) coordination polymers
Source: Royal Society of Chemistry journal article supplement (doi:10.1039/b922767a), 2010-01-01
Supplement: b922767a.pdf [file b922767a.pdf]

## Supplementary materials

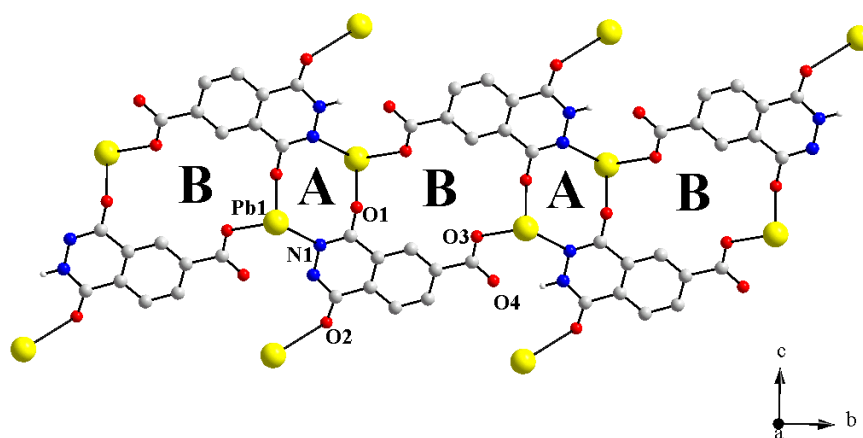

Fig. S1 The 1-D chain structure in [Pb(CPTH)(phen)] 1.

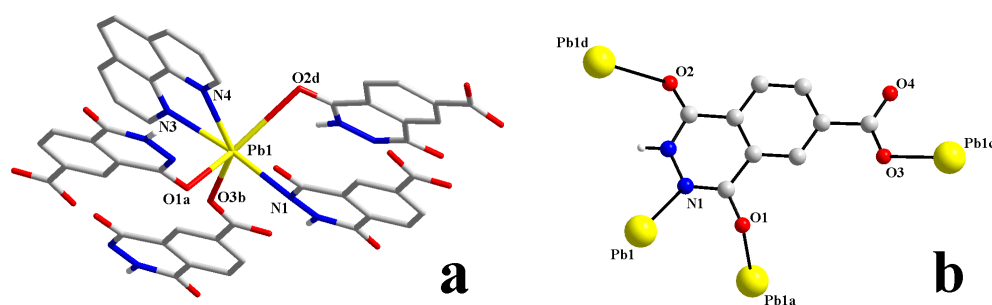

Fig. S2 The coordination environment of Pb center (a) and the bridging mode of CPTH ligand (b) in [Pb(CPTH)(phen)] 1 (a:  $-x+1, -y, -z$ ; b:  $x, y+1, z$ ; c:  $x, y-1, z$ ; d:  $-x+1, y, -z+0.5$ ).

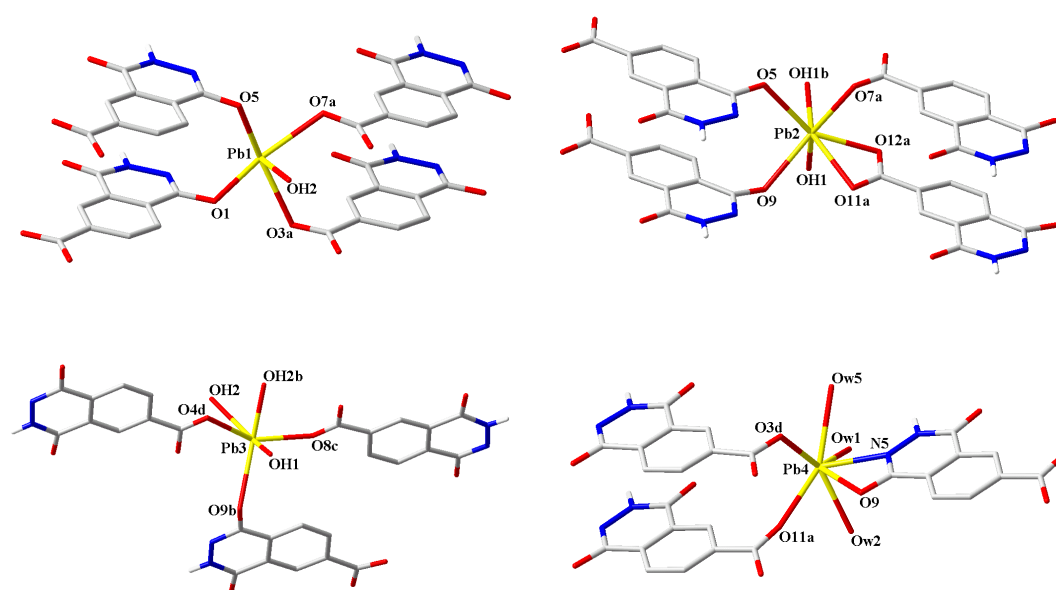

**Fig. S3** The coordination environments of four Pb(II) centers in  $[\text{Pb}_4(\text{OH})_2(\text{H}_2\text{O})_3(\text{CPTH})_3] \cdot 2\text{H}_2\text{O}$  **2** (a:  $x-1, y, z$ ; b:  $-x-2, -y+2, -z+1$ ; c:  $-x-1, -y+2, -z+1$ ; d:  $x-1, y+1, z$ ).

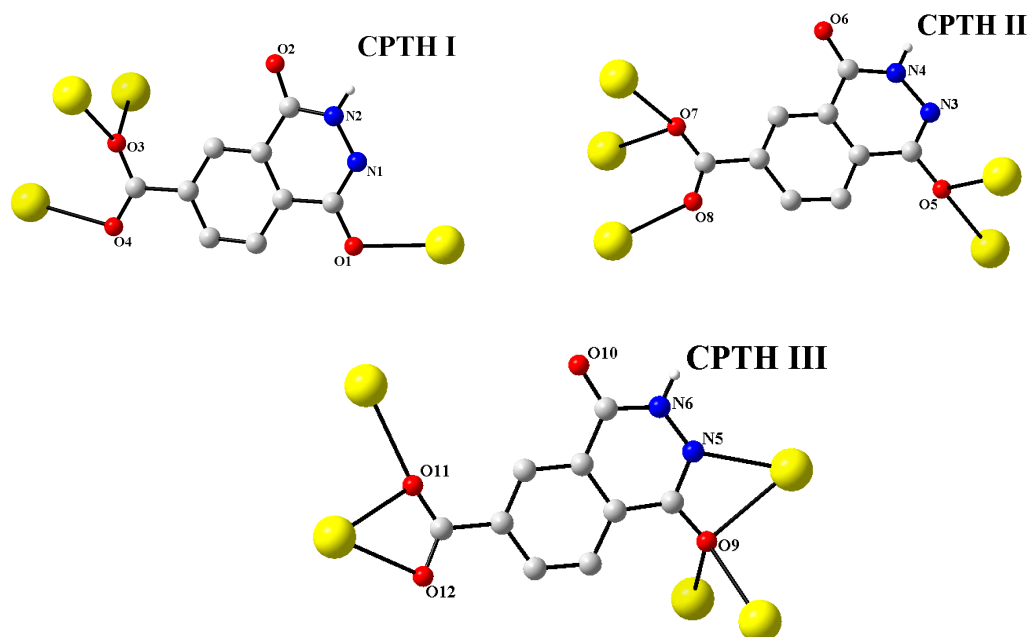

**Fig. S4** The bridging modes of CPTH ligands in  $[\text{Pb}_4(\text{OH})_2(\text{H}_2\text{O})_3(\text{CPTH})_3] \cdot 2\text{H}_2\text{O}$  **2**.

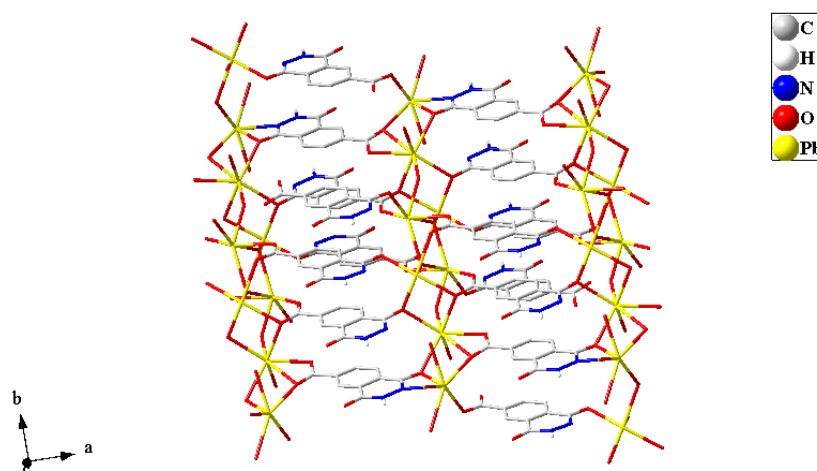

**Fig. S5** The projection plot of  $[\text{Pb}_4(\text{OH})_2(\text{H}_2\text{O})_3(\text{CPTH})_3] \cdot 2\text{H}_2\text{O}$  **2** in  $ab$  plane.

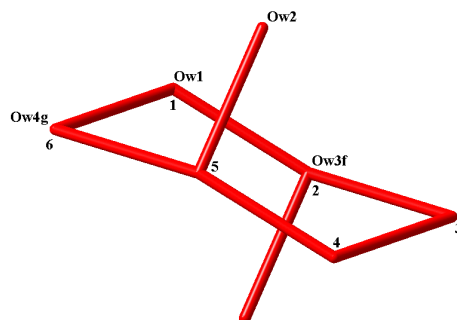

**Fig. S6** The water octamer with a chairlike hexamer at the core in compound **2**

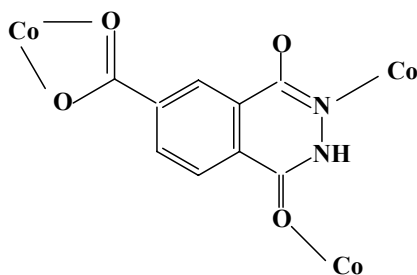

Fig. S7 The  $\mu_3$ -bridging mode for 4-CPTH in reported compound [Co(CPTH)(bpy)].

Table S1 Selected bond lengths [Å] and angles [°] for the title compounds

|                     |           |                       |            |
|---------------------|-----------|-----------------------|------------|
| Compound 1          |           |                       |            |
| Pb(1)-O(1)#1        | 2.310(5)  | Pb(1)-O(3)#2          | 2.423(4)   |
| Pb(1)-N(3)          | 2.673(5)  | Pb(1)-N(4)            | 2.691(5)   |
| Pb(1)-N(1)          | 2.677(5)  | O(1)-C(7)             | 1.312(7)   |
| O(2)-C(8)           | 1.242(7)  |                       |            |
| O(1)#1-Pb(1)-O(3)#2 | 79.78(18) | O(3)#2-Pb(1)-N(1)     | 97.62(19)  |
| O(1)#1-Pb(1)-N(3)   | 85.50(16) | N(3)-Pb(1)-N(1)       | 171.89(16) |
| O(3)#2-Pb(1)-N(3)   | 81.83(18) | O(1)#1-Pb(1)-N(4)     | 81.63(16)  |
| O(1)#1-Pb(1)-N(1)   | 86.43(15) | O(3)#2-Pb(1)-N(4)     | 139.87(18) |
| N(3)-Pb(1)-N(4)     | 61.46(15) | N(1)-Pb(1)-N(4)       | 116.37(16) |
| Compound 2          |           |                       |            |
| Pb(1)-OH2           | 2.226(5)  | Pb(1)-O(5)            | 2.400(6)   |
| Pb(1)-O(1)          | 2.426(6)  | Pb(1)-O(7)#1          | 2.637(6)   |
| Pb(1)-O(3)#1        | 2.673(6)  | Pb(2)-OH1             | 2.470(5)   |
| Pb(2)-OH1#2         | 2.498(5)  | Pb(2)-O(12)#1         | 2.612(6)   |
| Pb(2)-O(11)#1       | 2.626(6)  | Pb(2)-O(9)            | 2.660(5)   |
| Pb(2)-O(7)#1        | 2.707(6)  | Pb(2)-O(5)            | 2.738(6)   |
| Pb(3)-OH2#2         | 2.346(5)  | Pb(3)-OH1             | 2.374(5)   |
| Pb(3)-O(8)#3        | 2.507(7)  | Pb(3)-O(4)#4          | 2.569(6)   |
| Pb(4)-N(5)          | 2.484(7)  | Pb(4)-OW2             | 2.584(7)   |
| Pb(4)-O(3)#4        | 2.635(6)  | Pb(4)-O(11)#1         | 2.680(5)   |
| Pb(4)-O(9)          | 2.693(7)  | Pb(4)-OW1             | 2.728(9)   |
| O(1)-C(7)           | 1.294(9)  | O(2)-C(8)             | 1.239(9)   |
| O(5)-C(16)          | 1.318(9)  | O(6)-C(17)            | 1.251(9)   |
| O(9)-C(25)          | 1.293(9)  | O(10)-C(26)           | 1.259(9)   |
| OH2-Pb(1)-O(5)      | 83.4(2)   | O(5)-Pb(1)-O(7)#1     | 81.04(19)  |
| OH2-Pb(1)-O(1)      | 71.7(2)   | O(1)-Pb(1)-O(7)#1     | 153.56(19) |
| O(5)-Pb(1)-O(1)     | 88.7(2)   | OH2-Pb(1)-O(3)#1      | 78.84(19)  |
| OH2-Pb(1)-O(7)#1    | 82.9(2)   | O(5)-Pb(1)-O(3)#1     | 162.15(19) |
| O(1)-Pb(1)-O(3)#1   | 84.0(2)   | O(7)#1-Pb(1)-O(3)#1   | 98.51(18)  |
| OH1-Pb(2)-OH1#2     | 74.98(19) | O(12)#1-Pb(2)-O(11)#1 | 49.94(17)  |
| OH1-Pb(2)-O(12)#1   | 72.3(2)   | OH1-Pb(2)-O(9)        | 72.87(16)  |

|                      |            |                      |            |
|----------------------|------------|----------------------|------------|
| OH1#2-Pb(2)-O(12)#1  | 93.46(18)  | OH1#2-Pb(2)-O(9)     | 125.96(19) |
| OH1-Pb(2)-O(11)#1    | 86.1(2)    | O(12)#1-Pb(2)-O(9)   | 115.91(19) |
| OH1#2-Pb(2)-O(11)#1  | 142.87(18) | O(11)#1-Pb(2)-O(9)   | 75.74(19)  |
| OH1-Pb(2)-O(7)#1     | 143.15(18) | O(11)#1-Pb(2)-O(7)#1 | 87.4(2)    |
| OH1#2-Pb(2)-O(7)#1   | 89.10(18)  | O(9)-Pb(2)-O(7)#1    | 139.65(18) |
| O(12)#1-Pb(2)-O(7)#1 | 75.8(2)    | OH1-Pb(2)-O(5)       | 133.38(19) |
| OH1#2-Pb(2)-O(5)     | 81.06(18)  | O(9)-Pb(2)-O(5)      | 90.84(18)  |
| O(12)#1-Pb(2)-O(5)   | 149.41(19) | O(7)#1-Pb(2)-O(5)    | 74.01(18)  |
| O(11)#1-Pb(2)-O(5)   | 132.74(19) | OH2#2-Pb(3)-OH1      | 84.01(19)  |
| OH1-Pb(3)-O(8)#3     | 88.8(2)    | OH2#2-Pb(3)-O(8)#3   | 80.6(2)    |
| OH2#2-Pb(3)-O(4)#4   | 68.5(2)    | O(8)#3-Pb(3)-O(4)#4  | 146.1(2)   |
| OH1-Pb(3)-O(4)#4     | 74.7(2)    | N(5)-Pb(4)-OW2       | 78.1(3)    |
| N(5)-Pb(4)-O(3)#4    | 104.4(2)   | OW2-Pb(4)-O(11)#1    | 69.9(2)    |
| OW2-Pb(4)-O(3)#4     | 140.2(2)   | O(3)#4-Pb(4)-O(11)#1 | 76.1(2)    |
| N(5)-Pb(4)-O(11)#1   | 122.4(2)   | N(5)-Pb(4)-O(9)      | 50.41(19)  |
| O(3)#4-Pb(4)-O(9)    | 79.31(19)  | OW2-Pb(4)-O(9)       | 72.1(2)    |
| O(11)#1-Pb(4)-O(9)   | 74.31(17)  | N(5)-Pb(4)-OW1       | 78.6(3)    |
| O(11)#1-Pb(4)-OW1    | 134.6(3)   | OW2-Pb(4)-OW1        | 77.5(3)    |
| O(9)-Pb(4)-OW1       | 124.3(3)   | O(3)#4-Pb(4)-OW1     | 142.4(3)   |

Symmetry transformations used to generate equivalent atoms: #1  $-x+1, -y, -z$  #2  $x, y+1, z$  for **1**; #1  $x-1, y, z$  #2  $-x-2, -y+2, -z+1$   
#3  $-x-1, -y+2, -z+1$  #4  $x-1, y+1, z$  for **2**

**Table S2** Hydrogen-bonded parameters in compound **2**

| D-H...A        | $d(\text{D-H})$ (Å) | $d(\text{H...A})$ (Å) | $d(\text{D...A})$ (Å) | $\angle\text{D-H...A}$ (°) | Symmetry operation   |
|----------------|---------------------|-----------------------|-----------------------|----------------------------|----------------------|
| N2-H2A...O10#1 | 0.86                | 1.951                 | 2.798                 | 167.72                     | #1: $-x-1, -y+2, -z$ |
| N4-H4A...O6#1  | 0.86                | 2.046                 | 2.905                 | 178.27                     |                      |
| N6-H6A...O2#1  | 0.86                | 1.948                 | 2.802                 | 171.68                     |                      |
